# Supplementary material for: Effects of long-term elevated temperature on covering, sheltering and righting behaviors of the sea urchin Strongylocentrotus intermedius
Source: PeerJ. 2017 Mar 22;5:e3122. doi: 10.7717/peerj.3122 (PMC5364920; doi:10.7717/peerj.3122)
Supplement: Supplemental Information 1 [file peerj-05-3122-s002.xlsx]

## Sheet: water temperature
The data of temperature during the experiment
Date	week	Temperature (°C)
		group L	group H
2015-07-08	1	20	23.3
2015-07-09		19.7	23.3
2015-07-10		19.8	23.3
2015-07-11		19.6	23.3
2015-07-12		19.6	22.9
2015-07-13		20.1	23.5
2015-07-14
2015-07-15	2	19.5	23.1
2015-07-16		20.4	23.5
2015-07-17		20	23.1
2015-07-18		20	23.2
2015-07-19		19.7	23.2
2015-07-20		20.3	22.9
2015-07-21		20.3	23
2015-07-22	3	19.7	22.5
2015-07-23		19.9	22.9
2015-07-24		20	23.6
2015-07-25		20	23.7
2015-07-26		20.2	22.8
2015-07-27
2015-07-28		20	23.2
2015-07-29	4	20.1	22.7
2015-07-30		20.2	23.5
2015-07-31		20.1	23.6
2015-08-01		19.8	23.3
2015-08-02		20	23
2015-08-03		20.1	23.4
2015-08-04		20.3	23.4
2015-08-05	5	20.2	23.1
2015-08-06		19.8	22.9
2015-08-07		19.6	22.9
2015-08-08		20.3	23.8
2015-08-09
2015-08-10
2015-08-11		19.5	23.6
2015-08-12	6	19.8	23.5
2015-08-13		19.8	23.2
2015-08-14		20.2	23.6
2015-08-15		20.3	23.5
2015-08-16		20.3	23.6
2015-08-17		20.1	23
2015-08-18		20.1	23.2
2015-08-19	7	20.3	22.5
2015-08-20		19.9	23.4
2015-08-21		19.8	22.7
2015-08-22		20.2	23.5
2015-08-23		20.1	23.1
2015-08-24		20.3	23.4
2015-08-25		20	23.1
2015-08-26	8	20	22.7
2015-08-27		20	23.1
2015-08-28		19.8	23.4
2015-08-29		20	23.1
2015-08-30		19.8	23.5
2015-08-31		20.5	23.2
2015-09-01		20.4	23.2
2015-09-02	9	20	23.4
2015-09-03		20.2	23.2
2015-09-04		20.1	23.3
2015-09-05		20.4	23.5
2015-09-06		19.5	22.7
2015-09-07		20	23
2015-09-08		20.2	23.3
2015-09-09	10	19.5	22.6
2015-09-10		19.5	22.6
2015-09-11		20.2	22.9
2015-09-12
2015-09-13		20.2	23.2
2015-09-14		20.1	23.3
2015-09-15		19.8	22.9
2015-09-16	11	20.1	23.1
2015-09-17		19.8	23
2015-09-18		19.8	23.2
2015-09-19		20.1	23.4
2015-09-20		20.1	23.3
2015-09-21		19.8	23.3
2015-09-22		20	23.4
2015-09-23	12	19.5	22.6
2015-09-24		20	23
2015-09-25		20.1	23.2
2015-09-26		19.8	23.3
2015-09-27		19.5	22.7
2015-09-28		19.8	23.1
2015-09-29
2015-09-30		19.5	22.5
2015-10-01	13	19.8	22.8
2015-10-02		19.5	22.3
2015-10-03		19.6	22.5
2015-10-04		19.4	22.4
2015-10-05		19.4	22.9
2015-10-06		19.3	22.2
2015-10-07		19	22.5
2015-10-08	14	19	23.1
2015-10-09		18.7	22.5
2015-10-10		18.9	22.1
2015-10-11		18.5	22
2015-10-12		18.3	22
2015-10-13
2015-10-14		18.5	21.5
2015-10-15	15	18.3	22.1
2015-10-16		18.3	21.7
2015-10-17		18	21.3
2015-10-18		17.8	21
2015-10-19		17.5	20.7
2015-10-20		17.8	20.4
2015-10-21		17.8	20.5
2015-10-22	16	17.5	20
2015-10-23		17.5	20.7
2015-10-24		17.2	20
2015-10-25		17	19.3
2015-10-26		16.8	20
2015-10-27		17	20
2015-10-28		16.7	19.9
2015-10-29	17	16.5	19.5
2015-10-30		16.4	19.4
2015-10-31		16	19.5
2015-11-01		16	20
2015-11-02		15.5	19
2015-11-03		15.5	18.9
2015-11-04		15.6	19
2015-11-05	18	15.3	18.8
2015-11-06		14.6	18
2015-11-07		14.6	18.3
2015-11-08		14	17.4
2015-11-09		13.6	17
2015-11-10		13.6	17.1
2015-11-11		13.3	16.9
2015-11-12	19	13	16.5
2015-11-13		13.2	16
2015-11-14		12.5	16
2015-11-15
2015-11-16		12.2	15.7
2015-11-17		12	15.3
2015-11-18		12.3	15.1
2015-11-19	20	12	15.3
2015-11-20		12.3	15.3
2015-11-21		12.5	14.8
2015-11-22		12.5	14.5
2015-11-23		11.9	14.5
2015-11-24		12.3	15
2015-11-25		12.1	15.2
2015-11-26	21	12.5	15
2015-11-27		12.3	15.2
2015-11-28		11.7	15.2
2015-11-29		12	14.8
2015-11-30		11.3	14.7
2015-12-01		12.2	15
2015-12-02	22	12.5	14.8
2015-12-03		12.6	15.2
2015-12-04		12.3	15.3
2015-12-05		12.1	14.5
2015-12-06		11.8	14.7
2015-12-07		11.2	14
2015-12-08		11.7	15
2015-12-09	23	12	15.6
2015-12-10		12.5	15.3
2015-12-11		12	14.7
2015-12-12		11.6	14.3
2015-12-13		11.6	15
2015-12-14		12	15.3
2015-12-15		12.2	15.6
2015-12-16	24	11.7	14.9
2015-12-17		12	15
2015-12-18		11.5	14.5
2015-12-19		11.8	14.8
2015-12-20		11.3	14.5
2015-12-21		11.6	14.3
2015-12-22		11.6	14.6
2015-12-23	25	12.3	15.5
2015-12-24		11.6	14.3
2015-12-25		11.2	14.1
2015-12-26		11.6	14.4
2015-12-27		11.6	14.3
2015-12-28		11.3	14.6
2015-12-29		11.6	14.4
2015-12-30	26	11.5	15.1
2015-12-31		10.9	15
2016-01-01		11.1	14.8
2016-01-02
2016-01-03		11.5	14.5
2016-01-04		12	14.8
2016-01-05		11.7	14.5
2016-01-06	27	11.3	15
2016-01-07		11.1	14.3
2016-01-08		11.9	14.4
2016-01-09		11.3	14.7
2016-01-10		10.8	14
2016-01-11		10.7	14
2016-01-12		11	14.3
2016-01-13	28	11	14.5
2016-01-14		10.7	13.9
2016-01-15		11.5	15
2016-01-16		12	15.3
2016-01-17		11.8	14.6
2016-01-18		11.5	14.6
2016-01-19		11.3	14.4
2016-01-20	29	12	15
2016-01-21		11.8	14.8
2016-01-22		11.3	14.6
2016-01-23		10.7	14.2
2016-01-24		10.5	13.8
2016-01-25		11.2	14.2
2016-01-26		11	14.2
2016-01-27	30	11.5	14.5
2016-01-28		11.2	14.3
2016-01-29		11.5	14.7
2016-01-30		11	14.2
2016-01-31		11.3	14.4
2016-02-01		11.1	14.3
2016-02-02	31	11	14.6
